# Supplementary material
Source: MDPI journal article supplement (https://www.mdpi.com/2673-4141/4/4/52)
Supplement: s1 [file s1 › hydrogen-2638049-supplementary.pdf]

# Thermodynamics of Reversible Hydrogen Storage: Are Methoxy-Substituted Biphenyls Better through Oxygen Functionality?

Sergey P. Verevkin <sup>1,2,\*</sup>, Artemiy A. Samarov <sup>3</sup> and Sergey V. Vostrikov <sup>4</sup>

<sup>1</sup> Competence Centre CALOR, Faculty of Interdisciplinary Research, University of Rostock, 18059 Rostock, Germany

<sup>2</sup> Department of Physical Chemistry, Kazan Federal University, 420008 Kazan, Russia

<sup>3</sup> Department of Chemical Thermodynamics and Kinetics, Saint Petersburg State University, 198504 Saint Petersburg, Russia; samarov@yandex.ru

<sup>4</sup> Chemical-Technological Department, Samara State Technical University, 443100 Samara, Russia; vosser@mail.ru

\* Correspondence: sergey.verevkin@uni-rostock.de

## Materials

The samples of methoxy-biphenyls used in this work were of commercial origin (see Table S1). The sample of 2-methoxy-biphenyl was purified by fractional distillation under reduced pressure. The samples of 4-methoxy-biphenyl and 4,4'-dimethoxy-biphenyl were purified by fractional sublimation under reduced pressure. The final purities of the samples were determined by GC. The samples were analysed with a Hewlett Packard 5890 II series gas chromatograph equipped with a flame ionisation detector and an HP-5 capillary column (length, inside diameter, and film thickness of 25 m×0.32 mm×0.25 µm). The GC temperature program started at  $T = 323$  K, followed by heating at a rate of  $0.167 \text{ K} \cdot \text{s}^{-1}$  to  $T = 573$  K. No impurities (greater than 0.0002 mass fraction) were detected in samples used for thermochemical measurements.

**Table S1.** Provenance and purity of the materials

| Material <sup>a</sup>       | CAS      | Origin | Initial GC purity (mass fraction) | GC purity after purification (mass fraction) |
|-----------------------------|----------|--------|-----------------------------------|----------------------------------------------|
| 2-methoxybiphenyl (liq)     | 86-26-0  | TCI    | 0.9982                            | 0.9999 <sup>a</sup>                          |
| 4-methoxybiphenyl (cr)      | 613-37-6 | TCI    | 0.9990                            | 0.9998 <sup>b</sup>                          |
| 4,4'-dimethoxybiphenyl (cr) | 613-33-2 | Sigma  | 0.9931                            | 0.9998 <sup>b</sup>                          |

<sup>a</sup> Sample was additionally purified using fractional distillation and used for transpiration measurements.

<sup>b</sup> Sample was additionally purified using fractional sublimation and used for DSC and transpiration measurements.

## Transpiration method: Vapour pressure measurements

Absolute vapour pressures were measured using the transpiration method [1,2]. The main idea of this method is to saturate the gas stream flowing over the sample and to determine the amount of compound transferred by the gas within a given time. Approximately 0.5 to 0.8 g of the sample is mixed with glass beads (diameter 1 mm) and placed in the thermostatted U-shaped saturator. The glass beads are needed to enlarge the contact area between gas and sample. A stream of nitrogen at a well-defined flow rate was passed through the saturator at constant temperature ( $\pm 0.1$  K) maintained by Julabo FP51-SL refrigerated circulator, and the transported material was collected in a cold trap. The amount of condensed substance was usually determined by GC using a suitable n-alkane as an internal standard. The saturation vapour pressure  $p_i$  at each temperature  $T_i$  was calculated from the amount of condensate collected within a definite period of time:

$$p_i = m_i \cdot R \cdot T_a / V \cdot M_i ; \quad V = (n_{N_2} + n_i) \cdot R \cdot T_a / P_a \quad (\text{S1})$$

where  $V$  is the volume of the gas phase consisting of the  $n_{N_2}$  moles of the carrier gas and  $n_i$  mole of gaseous compound under study (with the molar mass  $M_i$ ) at the atmospheric pressure  $P_a$  and the ambient temperature  $T_a$ . The volume of the carrier gas  $V_{N_2}$  was determined by the digital flow rate sensor from integration with a microcontroller. We used the Honeywell S&C - HAFBLF0200C2AX5 digital flow rate sensor with uncertainty at the level of 2.5 %. The flow rate of the nitrogen stream was also controlled by using a soap bubble flow meter (HP soap film flowmeter (model 0101-0113)) and optimized in order to reach the saturation equilibrium of the transporting gas at each temperature under study. The volume of the carrier gas  $V_{N_2}$  was read from the digital flow sensor. The amount of the compound under investigation  $n_i$  in the carrier gas was estimated at each temperature using the ideal gas law. The standard uncertainties for  $T$ ,  $V$ ,  $p$ ,  $m$ , are standard uncertainties with 0.683 confidence levels.

Before starting the vapour pressure measurements, the sample was first pre-conditioned at 310-320 K (within about one hour) in order to remove possible traces of water. The saturator was then kept at 310-315 K (to remove possible traces of volatile compounds). To ensure that preconditioning was completed at the selected temperature, three samples were taken sequentially during sample rinsing and analyzed by GC. A constant vapour pressure at this temperature indicated that the transpiration experiments could begin. GC analysis of the transported material did not reveal any additional contamination. The absence of impurities and decomposition products was re-checked by GC analysis of the saturator content at the end of the entire series of experiments.

Standard uncertainties of vapor pressures were calculated with  $u(p_i/\text{Pa}) = 0.005 + 0.025(p_i/\text{Pa})$  for pressures below 5 Pa, and  $u(p_i/\text{Pa}) = 0.025 + 0.025(p_i/\text{Pa})$  for pressures from 5 to 3000 Pa. Uncertainty of the sublimation/vaporisation enthalpy  $U(\Delta_{cr,l}^g H_m^o)$  is the expanded uncertainty (0.95 level of confidence) calculated according to procedure described elsewhere [3,4].

The procedure for calculating the expanded uncertainties (0.95 level of confidence) of the vaporization enthalpies from the transpiration method includes uncertainties from the experimental transpiration conditions, uncertainties in the vapor pressure and uncertainties in the temperature adjustment to  $T = 298.15$  K, as described elsewhere [3,4]. Uncertainties include uncertainties from the experimental conditions and the fitting equation, vapour pressures, and uncertainties from adjustment of vaporisation enthalpies to the reference temperature  $T = 298.15$  K.

The uncertainties of the  $\Delta_l^g H_m^o(298.15 \text{ K})$ -values derived from the vapor pressures reported in the literature include uncertainties from the fitting equation and uncertainties from temperature adjustment to the reference temperature. Uncertainties in the temperature adjustment of vaporization enthalpies to  $T = 298.15$  K are estimated to account with 20% to the total adjustment.

### *Differential scanning calorimetry: thermal behavior and fusion enthalpies*

The thermal behavior of crystalline sample of methoxy-biphenyls including melting temperature and enthalpy of fusion was studied with a commercial DSC Mettler Toledo DSC 822e coupled with Huber TC100MT cooler [5]. The sample was placed in the standard non-pinned aluminium pan. The pan and sample were weighed with the Sartorius MSE3.6P-000-DM microbalance with the standard uncertainty of  $5 \cdot 10^{-6}$  g. The calibration of the DSC was checked with melting behaviour of reference indium sample. The temperature of fusion agreed with the recommended value better than 0.3 K. For the enthalpy of fusion the maximum deviation from the recommended value was at the level of  $0.2 \text{ kJ} \cdot \text{mol}^{-1}$ . In the first DSC run the sample was heated with a rate  $10 \text{ K} \cdot \text{min}^{-1}$  to 398 K ( $\sim 30 \text{ K}$  above melting temperature provided by supplier) and then cooled down to 298 K also with the rate  $10 \text{ K} \cdot \text{min}^{-1}$ . Such procedure provided sufficient contact between the sample and the bottom of pan. The DSC experiments were repeated three times.

### *Adjustment of vaporisation/sublimation/fusion enthalpies to the reference temperature $T = 298.18 \text{ K}$*

The standard molar enthalpies of vaporization/sublimation of methoxy-biphenyls at temperatures  $T$  were derived from the temperature dependence of the vapor pressures, approximated by Eq. (S1) using the following equation:

$$\Delta_{\text{cr,l}}^{\text{g}} H_{\text{m}}^{\text{o}}(T) = -b + \Delta_{\text{cr,l}}^{\text{g}} C_{\text{p,m}}^{\text{o}} \times T \quad (\text{S2})$$

where  $b$  is one of the adjustable parameters of Eq. (S1). The standard molar vaporization/sublimation entropies at temperatures  $T$  were also derived from the temperature dependences of the vapor pressures (approximated by Eq. S1) as follows:

$$\Delta_{\text{cr,l}}^{\text{g}} S_{\text{m}}^{\text{o}}(T) = \Delta_{\text{cr,l}}^{\text{g}} H_{\text{m}}^{\text{o}}/T + R \times \ln(p_i/p^{\text{o}}) \quad (\text{S3})$$

with  $p^{\text{o}} = 0.1$  MPa. According to common practice, the comparison of thermochemical results is usually carried out at the reference temperature  $T = 298.15$  K.

The general thermochemical equation:

$$\Delta_{\text{cr}}^{\text{g}} H_{\text{m}}^{\text{o}} = \Delta_{\text{l}}^{\text{g}} H_{\text{m}}^{\text{o}} + \Delta_{\text{cr}}^{\text{l}} H_{\text{m}}^{\text{o}} \quad (\text{S4}),$$

connects the phase change enthalpies and it can be used to establish an internal consistency of the experimental data on the experimental sublimation (Table 2), fusion (Table 3), and vaporization enthalpies (Table 2). It is important that all enthalpies involved in Eq. (S4) are referenced to the same temperature, *e.g.* to the reference temperature  $T = 298.15$  K. However, the enthalpies of fusion results given in Table 3 are ascribed to the melting temperature. These data must be adjusted to the reference temperature  $T = 298.15$  K for the thermochemical calculations. For this purpose, we used the well-established general procedure [6,7] based on the Kirchhoff equation, *e.g.* for the sublimation enthalpy:

$$\Delta_{\text{cr}}^{\text{g}} H_{\text{m}}^{\text{o}}(298.15 \text{ K}) \text{ } /(\text{J} \cdot \text{mol}^{-1}) = \Delta_{\text{cr}}^{\text{g}} H_{\text{m}}^{\text{o}}(T_{\text{av}}/\text{K}) - (C_{\text{p,m}}^{\text{o}}(\text{cr}) - C_{\text{p,m}}^{\text{o}}(\text{liq})) \times [(T_{\text{av}}/\text{K}) - 298.15 \text{ K}] \quad (\text{S5})$$

where  $C_{\text{p,m}}^{\text{o}}(\text{cr})$  and  $C_{\text{p,m}}^{\text{o}}(\text{liq})$  are the isobaric molar heat capacities (given in Table S2).

The sublimation/vaporisation enthalpies, which are derived from the experimental vapor pressure-temperature dependencies according to the Clausius–Clapeyron relation, are referenced to the average temperature,  $T_{\text{av}}$ , of the examined interval. For engineering calculations, these enthalpies should be adjusted to the reference temperature  $T = 298.15$  K. The enthalpies of sublimation/vaporisation are derived using the following equation:

$$\Delta_{\text{cr,l}}^{\text{g}} H_{\text{m}}^{\text{o}}(T) = -b + \Delta_{\text{cr,l}}^{\text{g}} C_{\text{p,m}}^{\text{o}} \times T \quad (\text{S6})$$

The  $\Delta_{\text{cr,l}}^{\text{g}} C_{\text{p,m}}^{\text{o}}$ -values used in Eq. (S6) are usually derived according to empirical equations developed by Chickos and Acree [6,7]:

$$\Delta_{\text{l}}^{\text{g}} C_{\text{p,m}}^{\text{o}}(298.15 \text{ K}) = -0.26 \times C_{\text{p,m}}^{\text{o}}(\text{liq}, 298.15 \text{ K}) - 10.58 \quad (\text{S7})$$

$$\Delta_{\text{cr}}^{\text{g}} C_{\text{p,m}}^{\text{o}}(298.15 \text{ K}) = -0.15 \times C_{\text{p,m}}^{\text{o}}(\text{cr}, 298.15 \text{ K}) - 0.75 \quad (\text{S8})$$

where  $C_{\text{p,m}}^{\text{o}}(\text{cr}, 298.15 \text{ K})$  or  $C_{\text{p,m}}^{\text{o}}(\text{liq}, 298.15 \text{ K})$  values are of experimental origin or they can be also estimated according to the group-additivity procedure [6,7]. For calculations with methoxy-substituted compounds we used the modified Eq. (7)

$$\Delta_{\text{l}}^{\text{g}} C_{\text{p,m}}^{\text{o}}(298.15 \text{ K}) = -0.181 \times C_{\text{p,m}}^{\text{o}}(\text{liq}, 298.15 \text{ K}) - 10.58 \quad (\text{S9})$$

which was developed in our recent work based on the evaluated data for methoxy-benzene [8].

According to common practice, the experimental,  $\Delta_{\text{cr}}^{\text{l}}H_{\text{m}}^{\text{o}}(T_{\text{fus}})$ -values must also be adjusted to  $T = 298.15$  K using Eq. (10) [6,7]:

$$\Delta_{\text{cr}}^{\text{l}}H_{\text{m}}^{\text{o}}(298.15 \text{ K})/(\text{J}\cdot\text{mol}^{-1}) = \Delta_{\text{cr}}^{\text{l}}H_{\text{m}}^{\text{o}}(T_{\text{fus}}/\text{K}) - (\Delta_{\text{cr}}^{\text{g}}C_{\text{p,m}}^{\text{o}} - \Delta_{\text{l}}^{\text{g}}C_{\text{p,m}}^{\text{o}}) \times [(T_{\text{fus}}/\text{K}) - 298.15 \text{ K}] \quad (\text{S10})$$

The values of  $\Delta_{\text{cr}}^{\text{g}}C_{\text{p,m}}^{\text{o}}$  and  $\Delta_{\text{l}}^{\text{g}}C_{\text{p,m}}^{\text{o}}$  are listed in the Table S2. The enthalpies of fusion,  $\Delta_{\text{cr}}^{\text{l}}H_{\text{m}}^{\text{o}}(298.15 \text{ K})$ , estimated with Eq. (10) are given in Table 3, column 4. These values can now be used to establish consistency of the phase transitions for methoxy-biphenyls collected in Table 2 as follows:

$$\Delta_{\text{cr}}^{\text{g}}H_{\text{m}}^{\text{o}}(298.15 \text{ K}) = \Delta_{\text{l}}^{\text{g}}H_{\text{m}}^{\text{o}}(298.15 \text{ K}) + \Delta_{\text{cr}}^{\text{l}}H_{\text{m}}^{\text{o}}(298.15 \text{ K}) \quad (\text{S11})$$

when all enthalpies are adjusted to the common temperature  $T = 298.15$  K.

**Table S2**

Compilation of data on molar heat capacities  $C_{\text{p,m}}^{\text{o}}(\text{liq})$  and heat capacity differences  $\Delta_{\text{l}}^{\text{g}}C_{\text{p,m}}^{\text{o}}$  (in  $\text{J}\cdot\text{K}^{-1}\cdot\text{mol}^{-1}$ ) at  $T = 298.15$  K

| Compounds                  | $C_{\text{p,m}}^{\text{o}}(\text{liq})^{\text{a}}$ | $-\Delta_{\text{l}}^{\text{g}}C_{\text{p,m}}^{\text{o}}^{\text{b}}$ | $C_{\text{p,m}}^{\text{o}}(\text{cr})^{\text{a}}$ | $-\Delta_{\text{cr}}^{\text{g}}C_{\text{p,m}}^{\text{o}}^{\text{c}}$ |
|----------------------------|----------------------------------------------------|---------------------------------------------------------------------|---------------------------------------------------|----------------------------------------------------------------------|
| methoxy-biphenyl           | 305.0                                              | 65.8                                                                | 238.1                                             | 36.5                                                                 |
| methoxy-bicyclohexane      | 357.8                                              | 75.3                                                                |                                                   |                                                                      |
| di-methoxy-biphenyl        | 361.4                                              | 76.0                                                                | 284.2                                             | 43.4                                                                 |
| di-methoxy-bicyclohexane   | 415.4                                              | 85.8                                                                |                                                   |                                                                      |
| methoxy-iso-propyl-benzene | 272.9                                              | 60.0                                                                |                                                   |                                                                      |
| iso-propyl-phenol          | 284.9                                              | 84.7                                                                | 192.4                                             | 29.6                                                                 |
| phenyl-phenol              | 317.0                                              | 93.0                                                                | 206.2                                             | 31.7                                                                 |
| methoxy-cyclohexane        | 213.0                                              | 49.1                                                                |                                                   |                                                                      |

<sup>a</sup> The  $C_{\text{p,m}}^{\text{o}}(\text{liq})$ -values were calculated according to group-additivity procedure developed by Chickos *et al.* [6,7].

<sup>b</sup> Calculated according to empirical equation Eq. (S9).

<sup>c</sup> Calculated according to empirical equation Eq. (S8).

**Table S3**

The vapor pressures  $p$ , and standard molar vaporization enthalpies and entropies obtained by the approximation of boiling points at different pressures available in the literature [9–11].

| $T/\text{K}^{\text{a}}$                                                                                                                     | $p/\text{Pa}$ | $\Delta_{\text{l}}^{\text{g}}H_{\text{m}}^{\text{o}}/\text{kJ}\cdot\text{mol}^{-1}$ | $\Delta_{\text{l}}^{\text{g}}S_{\text{m}}^{\text{o}}/\text{J}\cdot\text{K}^{-1}\cdot\text{mol}^{-1}$ |
|---------------------------------------------------------------------------------------------------------------------------------------------|---------------|-------------------------------------------------------------------------------------|------------------------------------------------------------------------------------------------------|
| 4-methoxy-biphenyl; $\Delta_{\text{l}}^{\text{g}}H_{\text{m}}^{\text{o}}(298.15 \text{ K}) = (76.5 \pm 5.0) \text{ kJ}\cdot\text{mol}^{-1}$ |               |                                                                                     |                                                                                                      |
| $\ln(p/p_{\text{ref}}) = \frac{306.2}{R} - \frac{96129.8}{RT} - \frac{65.8}{R} \ln \frac{T}{298.15}; p_{\text{ref}} = 1 \text{ Pa}$         |               |                                                                                     |                                                                                                      |
| 430                                                                                                                                         | 1333          | 67.8                                                                                | 121.9                                                                                                |
| 447                                                                                                                                         | 2533          | 66.7                                                                                | 118.7                                                                                                |
| 453                                                                                                                                         | 2266          | 66.3                                                                                | 114.9                                                                                                |
| 573                                                                                                                                         | 101325        | 58.4                                                                                | 102.1                                                                                                |

3-methoxy-biphenyl;  $\Delta_{\text{l}}^{\text{g}}H_{\text{m}}^{\text{o}}(298.15 \text{ K}) = (77.1 \pm 2.7) \text{ kJ}\cdot\text{mol}^{-1}$

|                                                                                                                                                         |                                                                                                                                        |      |       |
|---------------------------------------------------------------------------------------------------------------------------------------------------------|----------------------------------------------------------------------------------------------------------------------------------------|------|-------|
|                                                                                                                                                         | $\ln (p/p_{\text{ref}}) = \frac{308.3}{R} - \frac{96735.3}{RT} - \frac{65.8}{R} \ln \frac{T}{298.15} ; p_{\text{ref}} = 1 \text{ Pa}$  |      |       |
| 358                                                                                                                                                     | 27                                                                                                                                     | 73.2 | 136.0 |
| 359                                                                                                                                                     | 27                                                                                                                                     | 73.1 | 135.2 |
| 393                                                                                                                                                     | 200                                                                                                                                    | 70.9 | 128.7 |
| 396                                                                                                                                                     | 200                                                                                                                                    | 70.7 | 126.8 |
| 399                                                                                                                                                     | 200                                                                                                                                    | 70.5 | 125.0 |
| 413                                                                                                                                                     | 667                                                                                                                                    | 69.6 | 126.8 |
| 566                                                                                                                                                     | 101325                                                                                                                                 | 59.5 | 105.1 |
| 4,4'-di-methoxy-biphenyl; $\Delta_{\text{l}}^{\text{g}}H_{\text{m}}^{\text{o}}(298.15 \text{ K}) = (92.4 \pm 3.2) \text{ kJ} \cdot \text{mol}^{-1}$     |                                                                                                                                        |      |       |
|                                                                                                                                                         | $\ln (p/p_{\text{ref}}) = \frac{337.8}{R} - \frac{114836.0}{RT} - \frac{75.3}{R} \ln \frac{T}{298.15} ; p_{\text{ref}} = 1 \text{ Pa}$ |      |       |
| 388                                                                                                                                                     | 13                                                                                                                                     | 85.6 | 146.5 |
| 403                                                                                                                                                     | 40                                                                                                                                     | 84.5 | 144.6 |
| 438                                                                                                                                                     | 267                                                                                                                                    | 81.9 | 137.6 |
| 611                                                                                                                                                     | 101325                                                                                                                                 | 68.8 | 112.6 |
| 2-methoxy-iso-propyl-benzene; $\Delta_{\text{l}}^{\text{g}}H_{\text{m}}^{\text{o}}(298.15 \text{ K}) = (50.9 \pm 3.8) \text{ kJ} \cdot \text{mol}^{-1}$ |                                                                                                                                        |      |       |
|                                                                                                                                                         | $\ln (p/p_{\text{ref}}) = \frac{267.8}{R} - \frac{68743.1}{RT} - \frac{60.0}{R} \ln \frac{T}{298.15} ; p_{\text{ref}} = 1 \text{ Pa}$  |      |       |
| 307                                                                                                                                                     | 267                                                                                                                                    | 50.3 | 114.4 |
| 308                                                                                                                                                     | 267                                                                                                                                    | 50.2 | 113.7 |
| 353                                                                                                                                                     | 1733                                                                                                                                   | 47.6 | 101.0 |
| 366                                                                                                                                                     | 2400                                                                                                                                   | 46.8 | 96.8  |
| 367                                                                                                                                                     | 2400                                                                                                                                   | 46.7 | 96.3  |
| 368                                                                                                                                                     | 2400                                                                                                                                   | 46.7 | 95.8  |
| 368                                                                                                                                                     | 2400                                                                                                                                   | 46.7 | 95.8  |
| 471                                                                                                                                                     | 101325                                                                                                                                 | 40.5 | 86.1  |
| 471                                                                                                                                                     | 97325                                                                                                                                  | 40.5 | 85.7  |
| 471                                                                                                                                                     | 101325                                                                                                                                 | 40.5 | 86.1  |
| 473                                                                                                                                                     | 97325                                                                                                                                  | 40.4 | 85.1  |
| 473                                                                                                                                                     | 101325                                                                                                                                 | 40.4 | 85.4  |
| 474                                                                                                                                                     | 101325                                                                                                                                 | 40.3 | 85.1  |
| 3-methoxy-iso-propyl-benzene; $\Delta_{\text{l}}^{\text{g}}H_{\text{m}}^{\text{o}}(298.15 \text{ K}) = (56.6 \pm 2.6) \text{ kJ} \cdot \text{mol}^{-1}$ |                                                                                                                                        |      |       |
|                                                                                                                                                         | $\ln (p/p_{\text{ref}}) = \frac{279.2}{R} - \frac{74528.2}{RT} - \frac{60.0}{R} \ln \frac{T}{298.15} ; p_{\text{ref}} = 1 \text{ Pa}$  |      |       |
| 332                                                                                                                                                     | 400                                                                                                                                    | 54.6 | 118.6 |
| 360                                                                                                                                                     | 1733                                                                                                                                   | 52.9 | 113.3 |
| 363                                                                                                                                                     | 1600                                                                                                                                   | 52.7 | 110.9 |
| 364                                                                                                                                                     | 1600                                                                                                                                   | 52.7 | 110.4 |
| 366                                                                                                                                                     | 2133                                                                                                                                   | 52.6 | 111.6 |
| 366                                                                                                                                                     | 1600                                                                                                                                   | 52.6 | 109.2 |
| 368                                                                                                                                                     | 2133                                                                                                                                   | 52.4 | 110.5 |
| 476                                                                                                                                                     | 98125                                                                                                                                  | 46.0 | 96.6  |
| 483                                                                                                                                                     | 101325                                                                                                                                 | 45.5 | 94.4  |
| 484                                                                                                                                                     | 101325                                                                                                                                 | 45.5 | 94.1  |
| 4-methoxy-iso-propyl-benzene; $\Delta_{\text{l}}^{\text{g}}H_{\text{m}}^{\text{o}}(298.15 \text{ K}) = (57.6 \pm 2.1) \text{ kJ} \cdot \text{mol}^{-1}$ |                                                                                                                                        |      |       |
|                                                                                                                                                         | $\ln (p/p_{\text{ref}}) = \frac{280.9}{R} - \frac{75489.5}{RT} - \frac{60.0}{R} \ln \frac{T}{298.15} ; p_{\text{ref}} = 1 \text{ Pa}$  |      |       |
| 331                                                                                                                                                     | 267                                                                                                                                    | 55.6 | 118.8 |
| 332                                                                                                                                                     | 200                                                                                                                                    | 55.6 | 115.7 |
| 332                                                                                                                                                     | 213                                                                                                                                    | 55.6 | 116.2 |
| 345                                                                                                                                                     | 400                                                                                                                                    | 54.8 | 112.9 |
| 355                                                                                                                                                     | 1333                                                                                                                                   | 54.2 | 116.7 |
| 358                                                                                                                                                     | 1333                                                                                                                                   | 54.0 | 115.0 |

|     |        |      |       |
|-----|--------|------|-------|
| 359 | 1733   | 53.9 | 116.6 |
| 368 | 2533   | 53.4 | 114.6 |
| 369 | 2533   | 53.3 | 114.0 |
| 373 | 2933   | 53.1 | 113.0 |
| 389 | 5999   | 52.1 | 110.7 |
| 390 | 5999   | 52.1 | 110.2 |
| 481 | 97058  | 46.7 | 96.9  |
| 481 | 97058  | 46.6 | 96.7  |
| 483 | 101325 | 46.5 | 96.4  |
| 483 | 101325 | 46.5 | 96.4  |
| 483 | 101991 | 46.5 | 96.5  |
| 484 | 101325 | 46.4 | 96.1  |
| 485 | 101325 | 46.4 | 95.8  |
| 485 | 97325  | 46.4 | 95.4  |
| 485 | 100791 | 46.4 | 95.7  |
| 486 | 101991 | 46.3 | 95.5  |
| 486 | 100791 | 46.3 | 95.4  |
| 487 | 101325 | 46.3 | 95.1  |
| 487 | 97325  | 46.3 | 94.8  |
| 488 | 101325 | 46.2 | 94.8  |

methoxy-cyclohexane;  $\Delta_1^g H_m^o(298.15 \text{ K}) = (42.7 \pm 1.9) \text{ kJ} \cdot \text{mol}^{-1}$

$$\ln(p/p_{\text{ref}}) = \frac{252.2}{R} - \frac{57363.5}{RT} - \frac{49.1}{R} \ln \frac{T}{298.15}; p_{\text{ref}} = 1 \text{ Pa}$$

|     |        |      |       |
|-----|--------|------|-------|
| 308 | 1467   | 42.2 | 102.0 |
| 325 | 5600   | 41.4 | 103.4 |
| 333 | 8533   | 41.0 | 102.7 |
| 334 | 8533   | 41.0 | 102.2 |
| 338 | 15999  | 40.8 | 105.4 |
| 403 | 95992  | 37.6 | 92.9  |
| 404 | 101325 | 37.5 | 93.0  |
| 404 | 95992  | 37.5 | 92.5  |
| 405 | 101325 | 37.5 | 92.6  |
| 405 | 101325 | 37.5 | 92.6  |
| 405 | 101325 | 37.5 | 92.6  |
| 406 | 101325 | 37.4 | 92.3  |
| 406 | 101325 | 37.4 | 92.3  |
| 406 | 101325 | 37.4 | 92.3  |
| 406 | 101325 | 37.4 | 92.2  |
| 406 | 101325 | 37.4 | 92.2  |
| 406 | 101325 | 37.4 | 92.2  |
| 407 | 101591 | 37.4 | 92.1  |
| 407 | 101325 | 37.4 | 92.0  |
| 407 | 101325 | 37.4 | 92.0  |
| 407 | 101325 | 37.4 | 92.0  |
| 408 | 101325 | 37.4 | 91.8  |
| 408 | 101325 | 37.3 | 91.6  |
| 408 | 101325 | 37.3 | 91.6  |
| 408 | 101325 | 37.3 | 91.6  |
| 408 | 100391 | 37.3 | 91.5  |
| 409 | 101325 | 37.3 | 91.3  |
| 409 | 101325 | 37.3 | 91.3  |
| 409 | 101325 | 37.3 | 91.3  |

---

<sup>a</sup> Uncertainties of the vaporization enthalpies are expressed as the expanded uncertainty (0.95 level of confidence,  $k = 2$ ). They include uncertainties from the fitting equation, and uncertainties from temperature adjustment to  $T = 298.15$  K. Uncertainties in the temperature adjustment of vaporization enthalpies to the reference temperature  $T = 298.15$  K are estimated to account with 20 % to the total adjustment.

**Table S4.** Correlation of vaporisation enthalpies,  $\Delta_f^g H_m^o(298.15 \text{ K})$ , of alkoxy-substituted aromatics with their Kovats indices ( $J_x$ )

| CAS        | Compound                  | $J_x^a$           | $\Delta_f^g H_m^o(298.15 \text{ K})_{\text{exp}}$ | $\Delta_f^g H_m^o(298.15 \text{ K})_{\text{calc}}^b$ | <sup>c</sup>                    |
|------------|---------------------------|-------------------|---------------------------------------------------|------------------------------------------------------|---------------------------------|
|            |                           | K                 | $\text{kJ}\cdot\text{mol}^{-1}$                   | $\text{kJ}\cdot\text{mol}^{-1}$                      | $\text{kJ}\cdot\text{mol}^{-1}$ |
| 100-66-3   | methoxy-benzene           | 894               | 46.4±0.2 [8]                                      | 46.6                                                 | -0.2                            |
| 2113-56-6  | 3-MeO-biphenyl            | 1606              | -                                                 | 79.3                                                 |                                 |
| 613-37-6   | 4-MeO-biphenyl            | 1606              | 79.9±0.9 [Table 2]                                | 79.3                                                 | 0.6                             |
| 6380-20-7  | 1-MeO-3-iso-propylbenzene | 1149              | 56.6±2.6 [Table S3]                               | 58.3                                                 | -1.7                            |
| 4132-48-3  | 1-MeO-4-iso-propylbenzene | 1159              | 57.6±2.1 [Table S3]                               | 58.8                                                 | -1.2                            |
| 103-73-1   | ethoxy-benzene            | 971               | 51.0±0.2 [12]                                     | 50.2                                                 | 0.8                             |
| 100-84-5   | 3-MeO-methylbenzene       | 1001              | 52.8±0.5 [13]                                     | 51.5                                                 | 1.3                             |
| 104-93-8   | 4-MeO-methylbenzene       | 1001              | 53.3±0.4 [13]                                     | 51.5                                                 | 1.8                             |
| 92-52-4    | biphenyl                  | 1342              | 65.8±0.2 [14]                                     | 67.2                                                 | -1.4                            |
| 1126-79-0  | n-butyl phenyl ether      | 1164              | 59.4±2.5 [15]                                     | 59.0                                                 | 0.4                             |
| 622-85-5   | n-propyl phenyl ether     | 1065              | 54.3±2.1 [15]                                     | 54.5                                                 | -0.2                            |
| 1515-95-3  | 4-MeO-ethylbenzene        | 1091              | 54.5±1.7 [16]                                     | 55.7                                                 | -1.2                            |
| 10568-38-4 | 3-MeO-ethylbenzene        | 1080              | 54.4±1.7 [16]                                     | 55.2                                                 | -0.8                            |
| 2132-80-1  | 4,4-diMeO-biphenyl        | 1879 <sup>d</sup> | 92.4±3.2 [Table S3]                               | 91.8                                                 | 0.6                             |
| 150-78-7   | 1,4-diMeO-benzene         | 1199              | 61.6±0.2 [17]                                     | 60.6                                                 | 1.0                             |
| 151-10-0   | 1,3-diMeO-benzene         | 1153              | 59.7±0.2 [17]                                     | 58.5                                                 | 1.2                             |

<sup>a</sup> Kovats indices,  $J_x$ , on the non-polar column Ultra 1 from [18].

<sup>b</sup> Calculated using equation  $\Delta_f^g H_m^o(298.15 \text{ K}) = 5.6 + 0.0459 \times J_x$  with  $R^2 = 0.9914$ , with the assessed expanded uncertainty of  $\pm 1.5 \text{ kJ}\cdot\text{mol}^{-1}$  (0.95 level of confidence,  $k = 2$ ).

<sup>c</sup> Difference between column 4 and 5 in this table.

<sup>d</sup> The Kovats index  $J_x = 1965$  measured on Ultra-ALLOY-5 [19] column was recalculated to the Kovats index  $J_x = 1879$  on the column Ultra 1, common for other entries in this table.

**Table S5.** Correlation of vaporisation enthalpies,  $\Delta_f^g H_m^o(298.15 \text{ K})$ , of 2-alkoxy-substituted aromatics with their Kovats indices ( $J_x$ )

| CAS         | Compound                  | $J_x^a$ | $\Delta_f^g H_m^o(298.15 \text{ K})_{\text{exp}}$ | $\Delta_f^g H_m^o(298.15 \text{ K})_{\text{calc}}^b$ | <sup>c</sup>                    |
|-------------|---------------------------|---------|---------------------------------------------------|------------------------------------------------------|---------------------------------|
|             |                           | K       | $\text{kJ}\cdot\text{mol}^{-1}$                   | $\text{kJ}\cdot\text{mol}^{-1}$                      | $\text{kJ}\cdot\text{mol}^{-1}$ |
| 103754-94-5 | 1-MeO-2-iso-propylbenzene | 1118    | 50.9±3.8 [Table S3]                               | 51.6                                                 | -0.7                            |
| 86-26-0     | 2-MeO-biphenyl            | 1511    | 57.8±0.5 [Table 1]                                | 57.6                                                 | 0.2                             |
| 578-58-5    | 1-MeO-2-methylbenzene     | 1005    | 50.2±0.4 [13]                                     | 49.9                                                 | 0.3                             |
| 14804-32-1  | 1-MeO-2-ethylbenzene      | 1060    | 51.2±1.6 [16]                                     | 50.7                                                 | 0.5                             |

<sup>a</sup> Kovats indices,  $J_x$ , on the standard non-polar columns from [18].

<sup>b</sup> Calculated using equation  $\Delta_f^g H_m^o(298.15 \text{ K}) = 34.6 + 0.0152 \times J_x$  with  $R^2 = 0.9775$ , with the assessed expanded uncertainty of  $\pm 1.0 \text{ kJ}\cdot\text{mol}^{-1}$  (0.95 level of confidence,  $k = 2$ ).

<sup>c</sup> Difference between column 4 and 5 in this table.

**Table S6**

Correlation of vaporization enthalpies,  $\Delta_1^g H_m^o(298.15 \text{ K})$ , of dialkyl ethers with their Kovats indices ( $J_x$ )

| CAS        | Ether                     | $J_x^a$ | $\Delta_1^g H_m^o(298.15 \text{ K})_{\text{exp}}^b$ | $\Delta_1^g H_m^o(298.15 \text{ K})_{\text{calc}}^c$ | $\Delta^d$                      |
|------------|---------------------------|---------|-----------------------------------------------------|------------------------------------------------------|---------------------------------|
|            |                           | K       | $\text{kJ}\cdot\text{mol}^{-1}$                     | $\text{kJ}\cdot\text{mol}^{-1}$                      | $\text{kJ}\cdot\text{mol}^{-1}$ |
| 598-53-8   | methyl iso-propyl ether   | 462     | 26.8±0.2                                            | 26.2                                                 | 0.6                             |
| 6795-87-5  | methyl sec-butyl ether    | 564     | 30.4±0.2                                            | 30.7                                                 | -0.3                            |
| 627-02-1   | ethyl iso-butyl ether     | 646     | 34.1±0.2                                            | 34.2                                                 | -0.1                            |
| 2679-87-0  | ethyl sec-butyl ether     | 648     | 34.2±0.2                                            | 34.2                                                 | 0.0                             |
| 627-08-7   | n-propyl iso-propyl ether | 650     | 34.0±0.2                                            | 34.5                                                 | -0.5                            |
| 1860-27-1  | n-butyl iso-propyl ether  | 725     | 38.8±0.2                                            | 38.7                                                 | 0.1                             |
| 15268-49-2 | n-propyl iso-butyl ether  | 740     | 38.3±0.2                                            | 38.5                                                 | -0.2                            |
| 61962-23-0 | n-propyl sec-butyl ether  | 744     | 37.9±0.2                                            | 38.6                                                 | -0.7                            |
| 628-55-7   | di-iso-butyl ether        | 808     | 41.2±0.2 [20]                                       | 40.9                                                 | 0.3                             |
| 6863-58-7  | di-sec-butyl ether        | 786     | 40.9±0.2                                            | 40.6                                                 | 0.3                             |
| 5756-37-6  | n-pentyl iso-propyl ether | 826     | 42.7±0.2                                            | 42.3                                                 | 0.4                             |
| 931-56-6   | methoxy-cyclohexane       | 840     |                                                     | <b>42.8±1.0</b>                                      |                                 |

<sup>a</sup> Kovats indices,  $J_x$ , on the standard non-polar columns from [21].

<sup>b</sup> Experimental values from [12].

<sup>c</sup> Calculated using equation  $\Delta_1^g H_m^o(298.15 \text{ K}) / (\text{kJ}\cdot\text{mol}^{-1}) = 5.8 + 0.0441 \times J_x$  with ( $R^2 = 0.9885$ ) with the assessed expanded uncertainty of  $\pm 1.0 \text{ kJ}\cdot\text{mol}^{-1}$  (0.95 level of confidence,  $k = 2$ ).

<sup>d</sup> Difference between column 4 and 5 in this table.

**Table S7**

Correlation of the normal boiling temperatures,  $T_b$ , of dialkyl ethers with their  $J_x$  (retention indices)

| CAS        | Ether                     | $T_b/\text{K}^a$   | $J_x(\text{exp})^b$ | $J_x(\text{calc})^c$ | $\Delta^d$ |
|------------|---------------------------|--------------------|---------------------|----------------------|------------|
| 598-53-8   | methyl iso-propyl ether   | 303.9              |                     | <b>462</b>           |            |
| 6795-87-5  | methyl sec-butyl ether    | 332.2              |                     | <b>564</b>           |            |
| 627-02-1   | ethyl iso-butyl ether     | 354.3              | 646                 | 644                  | 2          |
| 2679-87-0  | ethyl sec-butyl ether     | 354.4              | 648                 | 644                  | 4          |
| 627-08-7   | n-propyl iso-propyl ether | 356.2              |                     | <b>650</b>           |            |
| 1860-27-1  | n-butyl iso-propyl ether  | 382.3              | 725                 | 744                  | -19        |
| 15268-49-2 | n-propyl iso-butyl ether  | 381.0              |                     | <b>740</b>           |            |
| 61962-23-0 | n-propyl sec-butyl ether  | 382.2              |                     | <b>744</b>           |            |
| 628-55-7   | di-iso-butyl ether        | 396.2              | 808                 | 794                  | 14         |
| 6863-58-7  | di-sec-butyl ether        | 394.2              | 786                 | 787                  | -1         |
| 5756-37-6  | n-pentyl iso-propyl ether | 405.2              |                     | <b>826</b>           |            |
| 931-56-6   | methoxy-cyclohexane       | 409.0 <sup>e</sup> |                     | 840                  |            |

<sup>a</sup> Normal boiling temperatures are from Ref. [9–11].

<sup>b</sup> Kovats indices,  $J_x$ , on the standard non-polar columns from [21].

<sup>c</sup> Calculated using equation  $J_x = -629.8 + 3.594 \times T_b$  with  $R^2 = 0.974$

<sup>d</sup> Difference between column 4 and 5 in this table.

<sup>e</sup> From Table S3.

**Table S8**

Enthalpies of fusion ( $\Delta_{\text{cr}}^{\text{l}}H_{\text{m}}^{\circ}$ ), vaporization ( $\Delta_{\text{l}}^{\text{g}}H_{\text{m}}^{\circ}$ ) and sublimation ( $\Delta_{\text{cr}}^{\text{g}}H_{\text{m}}^{\circ}$ ) of auxiliary compounds at melting points ( $T_{\text{fus}}$ ) and 298 K (in  $\text{kJ}\cdot\text{mol}^{-1}$ )<sup>a</sup>

| Compound                 | $T_{\text{fus}}$<br>K | $\Delta_{\text{cr}}^{\text{l}}H_{\text{m}}^{\circ}(T_{\text{fus}})$<br>$\text{kJ}\cdot\text{mol}^{-1}$ | $\Delta_{\text{cr}}^{\text{l}}H_{\text{m}}^{\circ}(298\text{ K})^{\text{b}}$<br>$\text{kJ}\cdot\text{mol}^{-1}$ | $\Delta_{\text{cr}}^{\text{g}}H_{\text{m}}^{\circ}(298\text{ K})$<br>$\text{kJ}\cdot\text{mol}^{-1}$ | $\Delta_{\text{l}}^{\text{g}}H_{\text{m}}^{\circ}(298\text{ K})$<br>$\text{kJ}\cdot\text{mol}^{-1}$ |
|--------------------------|-----------------------|--------------------------------------------------------------------------------------------------------|-----------------------------------------------------------------------------------------------------------------|------------------------------------------------------------------------------------------------------|-----------------------------------------------------------------------------------------------------|
| 4-iso-propyl-phenol [22] | 334.1                 | $14.5\pm0.2$                                                                                           | $12.5\pm0.6$                                                                                                    | $82.8\pm1.0$                                                                                         | $70.3\pm1.2$                                                                                        |
| 4-sec-butyl-phenol [22]  | 335.2                 | $17.3\pm0.2$                                                                                           | $15.1\pm0.7$                                                                                                    | $89.1\pm0.6$                                                                                         | $74.0\pm0.9^{\text{c}}$                                                                             |
| 2-phenyl-phenol [23]     | 333.7                 | $15.5\pm0.2$                                                                                           | $13.3\pm0.7$                                                                                                    | $88.1\pm1.2$                                                                                         | $72.6\pm1.4^{\text{c}}$                                                                             |
| 3-phenyl-phenol [23]     | 351.0                 | $25.0\pm1.5^{\text{d}}$                                                                                | $21.8\pm1.8$                                                                                                    | $106.8\pm2.1^{\text{e}}$                                                                             | $85.0\pm1.0^{\text{e}}$                                                                             |
| 4-phenyl-phenol [23]     | 443.0                 | $31.6\pm0.2$                                                                                           | $22.7\pm2.7$                                                                                                    | $108.2\pm1.2$                                                                                        | $85.5\pm3.0^{\text{e}}$                                                                             |

<sup>a</sup> Uncertainties are presented as expanded uncertainties (0.95 level of confidence with  $k=2$ ).

<sup>b</sup> The  $\Delta_{\text{cr}}^{\text{l}}H_{\text{m}}^{\circ}$  at  $T_{\text{fus}}$  were adjusted to 298.15 K using Eq. (S9). Uncertainties were estimated with 30 % of the total adjustment [6,7].

<sup>c</sup> Difference of columns 5 and 4 in this table.

<sup>d</sup> Calculated using Eq. (S12) with the  $\text{WC} = 71.3\text{ J}\cdot\text{K}^{-1}\cdot\text{mol}^{-1}$  (see below Eq. 13).

<sup>e</sup> Sum of columns 6 and 4 in this table. For comparison  $\Delta_{\text{cr}}^{\text{g}}H_{\text{m}}^{\circ}(298\text{ K}) = 109.2\pm2.0\text{ kJ}\cdot\text{mol}^{-1}$  [24].

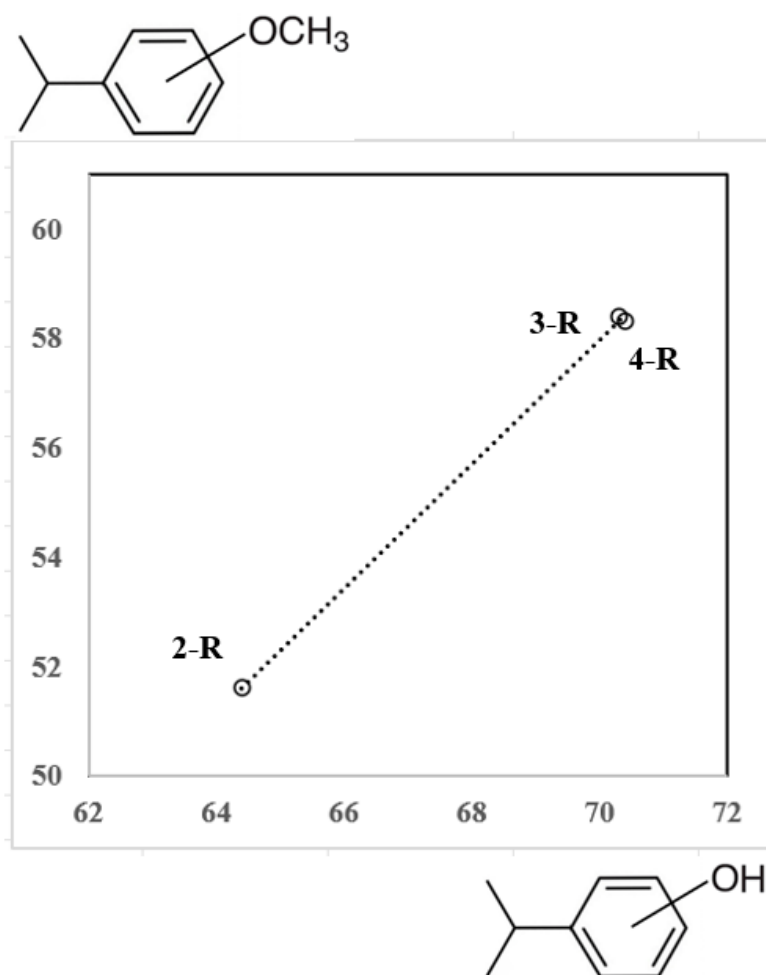

**Figure S1.** Correlation of vaporisation enthalpies,  $\Delta_{\text{l}}^{\text{g}}H_{\text{m}}^{\circ}(298.15\text{ K})$ , of hydroxy-iso-propylbenzenes and methoxy-iso-propylbenzenes. All values are in  $\text{kJ}\cdot\text{mol}^{-1}$  with R = position of the substituent on the benzene ring.

### Estimation of fusion enthalpies according to the Walden's Rule [25]

In 1908 Paul Walden found that the ratio according to Eq. (S12) can be considered as a constant (*Walden's Constant*) [26]:

$$WC = \frac{\Delta_{cr}^l H_m^o}{T_{fus}} = \Delta_{cr}^l S_m^o = 56.5 \text{ J} \cdot \text{K}^{-1} \cdot \text{mol}^{-1} \quad (\text{S12})$$

This observation was supported by experimental results from 35 compounds (mostly substituted benzenes like nitrobenzene, aniline, dimethylaniline, diphenylmethane, diphenylamine, acetophenone, *para*-propenylanisole, but also aliphatic esters, anhydrides, *etc.*). The prerequisite for this constancy is that the compounds did not associate in the liquid state. Eq. (S12) is known as *Walden's rule* for thermochemistry [27].

From a practical point of view and based on our experience, Eq. S12 can be easily adapted for calculations within a range of similarly shaped molecules. We have already observed similarity of *Walden's Constants* for R-acetanilides with R = alkyl, F, Cl, Br, NO<sub>2</sub>, NH<sub>2</sub>, OH, OCH<sub>3</sub> [17] and for the for R-substituted benzamides [28]. We have found that for these series the *WC* for each series deviates from the “classic” value 56.5 J·K<sup>-1</sup>·mol<sup>-1</sup> by about ± 10 J·K<sup>-1</sup>·mol<sup>-1</sup>. Such a “modified” *Walden's Constant* helps not only in evaluating the consistency of the experimental fusion data within a set of similarly structured compounds, but also the *Walden's rule* serves as a valuable tool for estimating missing fusion enthalpies of interesting compounds, provided that their fusion temperatures are available. Moreover, the “modified” *Walden's Rule* often helps to evaluate available phase transition data. The WC for 4-phenyl-phenol was calculated according to Eq. (S12) as follows:

$$WC = \frac{\Delta_{cr}^l H_m^o}{T_{fus}} = \frac{22700}{443} = 71.3 \text{ J} \cdot \text{K}^{-1} \cdot \text{mol}^{-1} \quad (\text{S13})$$

This value was also adopted to be valid for 3-phenyl-phenol (see Table S10).

#### Table S9

Correlation of vaporization enthalpies,  $\Delta_1^g H_m^o(298.15 \text{ K})$ , of substituted phenols with their Kovats indices ( $J_x$ )

| CAS      | Compound            | $J_x^a$ | $\Delta_1^g H_m^o(298.15 \text{ K})_{\text{exp}}$ | $\Delta_1^g H_m^o(298.15 \text{ K})_{\text{calc}}^b$ | $\Delta^c$           |
|----------|---------------------|---------|---------------------------------------------------|------------------------------------------------------|----------------------|
|          |                     | K       | kJ·mol <sup>-1</sup>                              | kJ·mol <sup>-1</sup>                                 | kJ·mol <sup>-1</sup> |
| 99-71-8  | 4-sec-butyl-phenol  | 1318    | 74.0±0.5 [Table S8]                               | 73.2                                                 | 0.8                  |
| 618-45-1 | 3-iso-propyl-phenol | 1228    |                                                   | <b>70.4</b>                                          |                      |
| 99-89-8  | 4-iso-propyl-phenol | 1247    | 70.3±0.5 [Table S8]                               | 71.0                                                 | -0.7                 |
| 580-51-8 | 3-phenyl-phenol     | 1704    |                                                   | <b>85.0</b>                                          |                      |

<sup>a</sup> Kovats indices,  $J_x$ , on the standard non-polar columns from [21].

<sup>b</sup> Calculated using equation  $\Delta_1^g H_m^o(298.15 \text{ K}) = 32.7 + 0.0307 \times J_x$  with  $R^2 = 0.9906$ , with the assessed expanded uncertainty of ±1.0 kJ·mol<sup>-1</sup> (0.95 level of confidence, k = 2).

<sup>c</sup> Difference between column 4 and 5 in this table.

**Table S10**Thermochemical data at  $T = 298.15$  K ( $p^\circ = 0.1$  MPa) for reference compounds (in  $\text{kJ}\cdot\text{mol}^{-1}$ )

| Compounds                   | $\Delta_f H_m^\circ(\text{liq})$ | $\Delta_l^\circ H_m^\circ$ | $\Delta_f H_m^\circ(\text{g})$ |
|-----------------------------|----------------------------------|----------------------------|--------------------------------|
| benzene [29]                | 49.0±0.9                         | 33.9±0.1                   | 82.9±0.9                       |
| methoxy-benzene [8]         | -116.9±0.7                       | 46.4±0.2                   | -70.3±0.7                      |
| biphenyl [14]               | 113.9±1.1                        | 65.8±0.2                   | 179.7±1.1                      |
| cyclohexane [30]            | -156.4±0.8                       | 33.1±0.2                   | -123.4±0.8                     |
| bicyclohexane [31]          | -273.5±1.5                       | 59.4±0.3                   | -214.1±1.5                     |
| methoxy-cyclohexane         | -313.7±3.5                       | 43.0±0.5 [Table 2]         | -270.7±3.5 [Table 6]           |
| iso-propyl-benzene [30]     | -41.1±1.0                        | 45.0±0.2                   | 4.0±1.0                        |
| iso-propyl-cyclohexane      |                                  | 44.0±0.2 [32]              | -196.2±3.5 <sup>a</sup>        |
| 2-hydroxy-iso-propylbenzene |                                  | 64.4±0.4 [22]              | -146.1±3.5 <sup>b</sup>        |
| 3-hydroxy-iso-propylbenzene |                                  | 70.3±1.2 [22]              | -149.9±3.5 <sup>b</sup>        |
| 4-hydroxy-iso-propylbenzene |                                  | 68.9±3.0 [22]              | -148.0±3.5 <sup>b</sup>        |
| 2-phenyl-phenol             |                                  | 72.6±1.4 [23]              |                                |
| 3-phenyl-phenol             |                                  | 87.4±3.0 [23]              |                                |
| 4-phenyl-phenol             |                                  | 85.5±3.0 [23]              |                                |
| acetone [30]                | -248.1±0.7                       | 30.8±0.2                   | -217.3±0.7                     |
| iso-propanol [30]           | -318.1±0.5                       | 45.3±0.2                   | -272.8±0.5                     |

<sup>a</sup> Calculated with G4 method using the atomisation reaction.<sup>b</sup> Calculated with G4 method using the WBR reaction (see Table 6).**Table S11**Correlation of the normal boiling temperatures,  $T_b$ , of dialkyl ethers with the standard molar enthalpies of vaporization,  $\Delta_l^\circ H_m^\circ(298.15 \text{ K})$ 

| CAS         | Ether                              | $T_b$ <sup>a</sup> | $\Delta_l^\circ H_m^\circ(298.15 \text{ K})_{\text{exp}}^b$ | $\Delta_l^\circ H_m^\circ(298.15 \text{ K})_{\text{calc}}^c$ | $\Delta^d$                      |
|-------------|------------------------------------|--------------------|-------------------------------------------------------------|--------------------------------------------------------------|---------------------------------|
|             |                                    | K                  | $\text{kJ}\cdot\text{mol}^{-1}$                             | $\text{kJ}\cdot\text{mol}^{-1}$                              | $\text{kJ}\cdot\text{mol}^{-1}$ |
| 598-53-8    | methyl iso-propyl ether            | 303.9              | 26.8±0.2                                                    | 26.2                                                         | 0.6                             |
| 6795-87-5   | methyl sec-butyl ether             | 332.2              | 30.4±0.2                                                    | 30.7                                                         | -0.3                            |
| 627-02-1    | ethyl iso-butyl ether              | 354.3              | 34.1±0.2                                                    | 34.2                                                         | -0.1                            |
| 2679-87-0   | ethyl sec-butyl ether              | 354.4              | 34.2±0.2                                                    | 34.2                                                         | 0.0                             |
| 627-08-7    | n-propyl iso-propyl ether          | 356.2              | 34.0±0.2                                                    | 34.5                                                         | -0.5                            |
| 1860-27-1   | n-butyl iso-propyl ether           | 382.3              | 38.8±0.2                                                    | 38.7                                                         | 0.1                             |
| 15268-49-2  | n-propyl iso-butyl ether           | 381.0              | 38.3±0.2                                                    | 38.5                                                         | -0.2                            |
| 61962-23-0  | n-propyl sec-butyl ether           | 382.2              | 37.9±0.2                                                    | 38.6                                                         | -0.7                            |
| 628-55-7    | di-iso-butyl ether                 | 396.2              | 41.2±0.2 [20]                                               | 40.9                                                         | 0.3                             |
| 6863-58-7   | di-sec-butyl ether                 | 394.2              | 40.9±0.2                                                    | 40.6                                                         | 0.3                             |
| 5756-37-6   | n-pentyl iso-propyl ether          | 405.2              | 42.7±0.2                                                    | 42.3                                                         | 0.4                             |
| 931-56-6    | methoxy-cyclohexane                | 409.0 <sup>e</sup> |                                                             | <b>42.9±0.6</b>                                              |                                 |
| 103754-94-5 | 1-methoxy-2-iso-propyl-cyclohexane | 458.2              |                                                             | <b>50.7±0.6</b>                                              |                                 |

<sup>a</sup> Normal boiling temperatures are from Ref. [9–11].<sup>b</sup> Experimental values from [12].<sup>c</sup> Calculated using equation  $\Delta_l^\circ H_m^\circ(298.15 \text{ K}) = -22.2 + 0.1592 \times T_b$  with  $R^2 = 0.993$ .with the assessed expanded uncertainty of  $\pm 0.6 \text{ kJ}\cdot\text{mol}^{-1}$  (0.95 level of confidence,  $k = 2$ ).<sup>d</sup> Difference between column 4 and 5 in this table.<sup>e</sup> From Table S3.<sup>d</sup> Experimental value from Ref. [33].

Basics of the group-additivity concept ("centerpiece" approach)

Group additivity (GA) methods are successfully used to predict both the gas-phase enthalpies of formation and vaporisation enthalpies. The idea behind conventional GA methods is to split the experimental enthalpies of molecules into relatively small groups in order to obtain well-defined numerical contributions for them. The prediction then proceeds as construction of a framework of desired model molecule from the appropriate number and type of these contributions. Comprehensive systems of group contributions (or increments) are developed, covering the main classes of organic compound. Admittedly, the applicability of GA in the case of cyclic molecules is limited. To overcome this limitation, various ring corrections are implemented in the GA parameterization, however, each correction term is specific only to a particular unsubstituted ring (*e.g.* for cyclobutane, cyclopentane, cyclohexane, *etc.*). However, any type of substitution significantly affects ring strain due to intense interactions of the substituent(s) with the ring. The idea of the "centerpiece" approach is to select a potentially large "centerpiece" molecule that has a reliable enthalpy and that can generally mimic the structure of the molecule of interest. Then the necessary groups or blocks are attached to the "centerpiece", resulting in the construction of the desired molecule. A prerequisite for this method is that reliable experimental data are available for the selected "centerpiece" molecule.

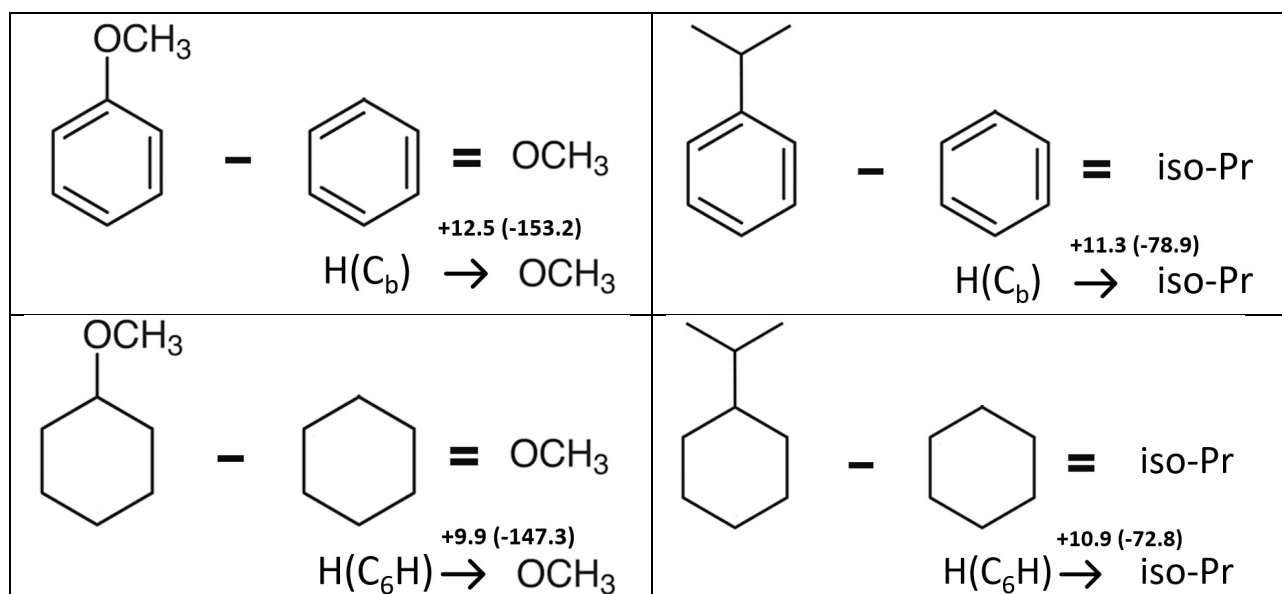

**Figure S2** The development of the contributions for calculating the vaporization enthalpies (or gas-phase enthalpies of formation) of aromatic and cyclic aliphatic hydrocarbons using the "centerpiece" approach. All values in  $\text{kJ}\cdot\text{mol}^{-1}$ . The numerical values of the contributions for the enthalpy of formation are given in parentheses after the contributions for the enthalpy of vaporisation.

**Table S12**

Group-additivity values  $I_i$  for calculation of enthalpies of vaporization,  $\Delta_f^\circ H_m^\circ$ , and enthalpies of formation,  $\Delta_f H_m^\circ(g)$ , of alkanes, ethers, and aromatics at 298.15 K in  $\text{kJ mol}^{-1}$

|                                                           | $\Delta_f^\circ H_m^\circ$ | $\Delta_f H_m^\circ(g)$ |
|-----------------------------------------------------------|----------------------------|-------------------------|
|                                                           | $I_i$ [34] [35]            | $I_i$ [36]              |
| <b>Alkanes</b>                                            |                            |                         |
| C-(C)(H) <sub>3</sub>                                     | 5.65                       | -42.05                  |
| C-(C) <sub>2</sub> (H) <sub>2</sub>                       | 4.98                       | -21.46                  |
| C-(C) <sub>3</sub> (H)                                    | 3.01                       | -9.04                   |
| C-(C) <sub>4</sub>                                        | 0.01                       | -1.26                   |
| six-ring                                                  | 1.88                       | 5.40                    |
| <b>Ethers</b>                                             |                            |                         |
| O-(C) <sub>2</sub>                                        | 8.78                       | -99.23                  |
| C-(O)(H) <sub>3</sub>                                     | 5.65                       | -42.05                  |
| C-(O)(C)(H) <sub>2</sub>                                  | 4.60                       | -33.06                  |
| C-(O)(C) <sub>2</sub> (H)                                 | 1.96                       | -25.64                  |
| C-(O)(C) <sub>3</sub>                                     | -1.88                      | -18.16                  |
| <b>Aromatics</b>                                          |                            |                         |
| C <sub>b</sub> -(C <sub>b</sub> ) <sub>2</sub> (H)        | 5.65                       | 13.82                   |
| C <sub>b</sub> -(C <sub>b</sub> ) <sub>2</sub> (C)        | 4.10                       | 23.05                   |
| C <sub>b</sub> -(C <sub>b</sub> ) <sub>2</sub> (O)        | 3.72                       | 1.88                    |
| C <sub>b</sub> -(C <sub>b</sub> ) <sub>3</sub> (biphenyl) | 4.65                       | 20.75                   |

**Table S13**

Structures of the most stable conformers and the G4 calculated gas-phase enthalpies of formation  $\Delta_f H_m^\circ(g)_{G4}$  at  $T = 298.15$  K ( $p^\circ = 0.1$  MPa) for methoxy-bicyclohexyls (in  $\text{kJ} \cdot \text{mol}^{-1}$ )

| compound               | structures                                                                           | $\Delta_f H_m^\circ(g)_{G4}^a$ |
|------------------------|--------------------------------------------------------------------------------------|--------------------------------|
| 2-methoxy-bicyclohexyl | 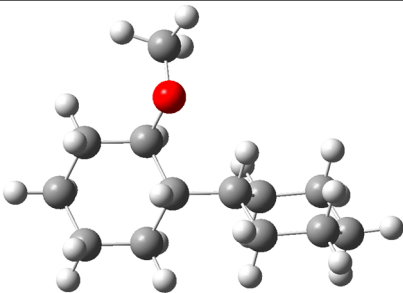 | -367.5                         |
| 3-methoxy-bicyclohexyl | 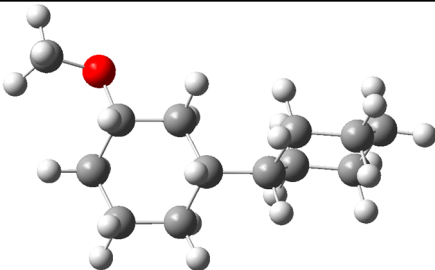 | -367.6                         |
| 4-methoxy-bicyclohexyl | 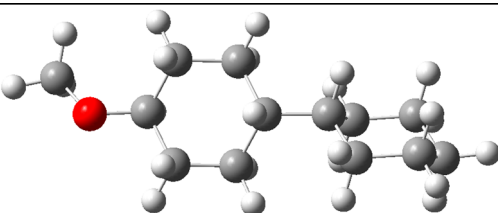 | -366.9                         |

|                                   |  |        |
|-----------------------------------|--|--------|
| 1-methoxy-2-isopropyl-cyclohexane |  | -346.1 |
| 1-methoxy-3-isopropyl-cyclohexane |  | -346.8 |
| 1-methoxy-4-isopropyl-cyclohexane |  | -346.0 |

<sup>a</sup> Calculated according to the G4 method using the atomization procedure.

## References

- Kulikov, D.; Verevkin, S.P.; Heintz, A. Determination of Vapor Pressures and Vaporization Enthalpies of the Aliphatic Branched C 5 and C 6 Alcohols. *J. Chem. Eng. Data* **2001**, *46*, 1593–1600, doi:10.1021/je010187p.
- Verevkin, S.P.; Emel'yanenko, V.N. Transpiration method: Vapor pressures and enthalpies of vaporization of some low-boiling esters. *Fluid Phase Equilib.* **2008**, *266*, 64–75, doi:10.1016/j.fluid.2008.02.001.
- Verevkin, S.P.; Sazonova, A.Y.; Emel'yanenko, V.N.; Zaitsau, D.H.; Varfolomeev, M.A.; Solomonov, B.N.; Zherikova, K. V. Thermochemistry of Halogen-Substituted Methylbenzenes. *J. Chem. Eng. Data* **2015**, *60*, 89–103, doi:10.1021/je500784s.
- Emel'yanenko, V.N.; Verevkin, S.P. Benchmark thermodynamic properties of 1,3-propanediol: Comprehensive experimental and theoretical study. *J. Chem. Thermodyn.* **2015**, *85*, 111–119, doi:10.1016/j.jct.2015.01.014.
- Emel'yanenko, V.N.; Zaitsau, D.H.; Shoifet, E.; Meurer, F.; Verevkin, S.P.; Schick, C.; Held, C. Benchmark Thermochemistry for Biologically Relevant Adenine and Cytosine. A Combined Experimental and Theoretical Study. *J. Phys. Chem. A* **2015**, *119*, 9680–9691, doi:10.1021/acs.jpca.5b04753.
- Chickos, J.S.; Hosseini, S.; Hesse, D.G.; Liebman, J.F. Heat capacity corrections to a standard state: a comparison of new and some literature methods for organic liquids and solids. *Struct. Chem.* **1993**, *4*, 271–278, doi:10.1007/BF00673701.
- Chickos, J.S.; Acree, W.E. Enthalpies of Vaporization of Organic and Organometallic Compounds, 1880–2002. *J. Phys. Chem. Ref. Data* **2003**, *32*, 519–878, doi:10.1063/1.1529214.
- Verevkin, S.P. Weaving a web of reliable thermochemistry around lignin building blocks: phenol, benzaldehyde, and anisole. *J. Therm. Anal. Calorim.* **2022**, *147*, 6073–6085, doi:10.1007/s10973-021-10924-x.
- SciFinder - Chemical Abstracts Service Available online: <http://scifinder.cas.org/> (accessed

on 24.04.2023).

10. Reaxys Available online: <https://www.reaxys.com/> (accessed on 24.04.2023).
11. Guidechem Chemical Network. Available online: <https://www.guidechem.com> (accessed on 24.04.2023).
12. Majer, V.; Svoboda, V. *Enthalpies of Vaporization of Organic Compounds: A Critical Review and Data Compilation*, Blackwell Scientific Publications, Oxford; 1985;
13. Emel'yanenko, V.N.; Zaitseva, K. V.; Agapito, F.; Martinho Simões, J.A.; Verevkin, S.P. Benchmark thermodynamic properties of methylanisoles: Experimental and theoretical study. *J. Chem. Thermodyn.* **2015**, *85*, 155–162, doi:10.1016/j.jct.2015.02.001.
14. Zaitsau, D.H.; Emel'yanenko, V.N.; Pimerzin, A.A.; Verevkin, S.P. Benchmark properties of biphenyl as a liquid organic hydrogen carrier: Evaluation of thermochemical data with complementary experimental and computational methods. *J. Chem. Thermodyn.* **2018**, *122*, 1–12, doi:10.1016/j.jct.2018.02.025.
15. Dreisbach, R.R.; Martin, R.A. Physical Data on Some Organic Compounds. *Ind. Eng. Chem.* **1949**, *41*, 2875–2878, doi:10.1021/ie50480a053.
16. Stull, D.R. Vapor Pressure of Pure Substances. Organic and Inorganic Compounds. *Ind. Eng. Chem.* **1947**, *39*, 517–540, doi:10.1021/ie50448a022.
17. Verevkin, S.P.; Konnova, M.E.; Turovtsev, V. V.; Riabchunova, A. V.; Pimerzin, A.A. Weaving a Network of Reliable Thermochemistry around Lignin Building Blocks: Methoxy-Phenols and Methoxy-Benzaldehydes. *Ind. Eng. Chem. Res.* **2020**, *59*, 22626–22639, doi:10.1021/acs.iecr.0c04281.
18. Okumura, T. Retention Indices of Environmental Chemicals on Methyl Silicone Capillary Column. *J. Environ. Chem.* **1991**, *1*, 333–358, doi:10.5985/jec.1.333.
19. Tsuge, S.; Ohtani, H.; Watanabe, C. *Pyrolysis - GC/MS Data Book of Synthetic Polymers*, Elsevier; 2011;
20. Efimova, A.A.; Druzhinina, A.I.; Varushchenko, R.M.; Dorofeeva, O. V.; Krasnyh, E.L. Phase Equilibria and Thermodynamic Properties of Some Branched Alkyl Ethers. *J. Chem. Eng. Data* **2009**, *54*, 2457–2469, doi:10.1021/je800998u.
21. NIST Chemistry WebBook. Available online: <https://webbook.nist.gov/chemistry/> (accessed on 30.08.2023).
22. Verevkin, S.P. Determination of the ortho -, para -, and meta -Interactions in secondary - Alkylphenols from Thermochemical Measurements. *Berichte der Bunsengesellschaft für Phys. Chemie* **1998**, *102*, 1467–1473, doi:10.1002/bbpc.199800015.
23. Verevkin, S.P. Thermochemistry of phenols: experimental standard molar enthalpies of formation of 2-phenylphenol, 4-phenylphenol, 2,6-diphenylphenol, and 2,2'- and 4,4'- dihydroxybiphenyl. *J. Chem. Thermodyn.* **1998**, *30*, 389–396, doi:10.1006/jct.1997.0316.
24. Bertholon, G.; Giray, M.; Perrin, R.; Vincent-Falquet-Berny, M.F. No. 532. - Etude physicochimique des phenols. OX. - Ethanlpies de combustion et energies de resonance des alcoyl et aryphenols. *Bull. Soc. Chim. Fr.* **1971**, 3180–3187.
25. Abdelaziz, A.; Zaitsau, D.H.; Kuratieva, N. V.; Verevkin, S.P.; Schick, C. Melting of nucleobases. Getting the cutting edge of “Walden’s Rule.” *Phys. Chem. Chem. Phys.* **2019**, *21*, 12787–12797, doi:10.1039/C9CP00716D.
26. Walden, P. Über die Schmelzwärme, spezifische Kohäsion und Molekulargrösse bei der Schmelztemperatur. *Zeitschrift für Elektrotechnik und Elektrochemie* **1908**, *14*, 713–724, doi:10.1002/bbpc.19080144302.
27. Chickos, J.S.; Hesse, D.G.; Liebman, J.F. Estimating Enthalpies of Sublimation of Hydrocarbons. In *Energetics of Organometallic Species*; Springer Netherlands: Dordrecht, 1992; pp. 159–169.
28. Nagrimanov, R.N.; Ziganshin, M.A.; Solomonov, B.N.; Verevkin, S.P. Thermochemistry of drugs: experimental and theoretical study of analgesics. *Struct. Chem.* **2019**, *30*, 247–261, doi:10.1007/s11224-018-1188-z.
29. Roux, M.V.; Temprado, M.; Chickos, J.S.; Nagano, Y. Critically evaluated thermochemical

- properties of polycyclic aromatic hydrocarbons. *J. Phys. Chem. Ref. Data* **2008**, *37*, 1855–1996, doi:10.1063/1.2955570.
30. Pedley, J.B.; Naylor, R.D.; Kirby, S.P. Thermochemical data of organic compounds, Chapman and Hall, New York. **1986**, 1–792.
  31. Konnova, M.E.; Vostrikov, S. V.; Pimerzin, A.A.; Verevkin, S.P. Thermodynamic analysis of hydrogen storage: Biphenyl as affordable liquid organic hydrogen carrier (LOHC). *J. Chem. Thermodyn.* **2021**, *159*, 106455, doi:10.1016/j.jct.2021.106455.
  32. Mokbel, I.; Rauzy, E.; Loiseleur, H.; Berro, C.; Jose, J. Vapor pressures of 12 alkylcyclohexanes, cyclopentane, butylcyclopentane and trans-decahydronaphthalene down to 0.5 Pa. Experimental results, correlation and prediction by an equation of state. *Fluid Phase Equilib.* **1995**, *108*, 103–120, doi:10.1016/0378-3812(95)02707-L.
  33. Hüchel, W.; Bross, R.; Fechtig, O.; Feltkamp, H.; Geiger, S.; Hanack, M.; Heinzl, M.; Hubele, A.; Kurz, J.; Maier, M.; et al. Beiträge zur Konstellationsanalyse, III Alkoholyse von Toluolsulfonsäureestern, V. *Justus Liebigs Ann. Chem.* **1959**, *624*, 142–255, doi:10.1002/jlac.19596240113.
  34. Ducros, M.; Gruson, J.F.; Sannier, H. Estimation des enthalpies de vaporisation des composés organiques liquides. Partie 1. Applications aux alcanes, cycloalcanes, alcènes, hydrocarbures benzeniques, alcools, alcanes thiols, chloro et bromoalcanes, nitriles, esters, acides et aldehydes. *Thermochim. Acta* **1980**, *36*, 39–65, doi:10.1016/0040-6031(80)80109-2.
  35. Ducros, M.; Gruson, J.F.; Sannier, H.; Velasco, I. Estimation des enthalpies de vaporisation des composés organiques liquides. Partie 2. Applications aux éthersoxydes, thioalcanes, cétones et amines. *Thermochim. Acta* **1981**, *44*, 131–140, doi:10.1016/0040-6031(81)80035-4.
  36. Verevkin, S.P.; Beckhaus, H.-D.; Belen'kaja, R.S.; Rakus, K.; Rüchardt, C. Geminal substituent effects Part 9. Standard enthalpies of formation and strain free increments of branched esters and ethers. *Thermochim. Acta* **1996**, *279*, 47–64, doi:10.1016/0040-6031(96)90061-1.
